# Supplementary material
Source: publisher site journal article supplement (https://www.dovepress.com/get_supplementary_file.php?f=399318.docx)
Supplement: Supplementary file 1 [file get_supplementary_file.php]

Supplementary Table S1

The primers (5’-3’) used in this study

| Primers for qRT-PCR | | | 5’-3’ | |
| --- | --- | --- | --- | --- |
|  | CircROBO1 | Forward | | TGGGCAAAGCTGAAGCATCT |
|  |  | Reverse | | AGCGTCACTTTTACGGGTGT |
|  | ROBO1 | Forward | | GGGACCCTATTTCCACTCCC |
|  |  | Reverse | | GGGAGCCTGAACAGAGACAT |
|  | miR-130a-5p | Forward | | CCAGGGCTTTTCAAAAATGA |
|  |  | Reverse | | CCGATCCAATCTGTTCTGGT |
|  | CCNT2 | Forward | | CCATTGAACACCCACACACAG |
|  |  | Reverse | | CTGCCTGATTAGCCCTCCAG |
|  | β-actin | Forward | | TTCGCGGGCGACGAT |
|  |  | Reverse | | CCACATAGGAATCCTTCTGACC |
|  | U6 | Forward | | CTCGCTTCGGCAGCACA |
|  |  | Reverse | | AACGCTTCACGAATTTGCGT |

Supplementary Table S2

Effective sequences (5’-3’) of lentivirus plasmids-overexpression.

| Plasmids | |  |
| --- | --- | --- |
| LV-circROBO1 ATACGAGGAGGAAAGCTCATGATCACTTACACCCGTAAAAGTGACGCTGGCAAATATGTTTGTGTTGGTACCAATATGGTTGGGGAACGTGAGAGTGAAGTAGCCGAGCTGACTGTCTTAGAGAGACCATCATTTGTGAAGAGACCCAGTAACTTGGCAGTAACTGTGGATGACAGTGCAGAATTTAAATGTGAGGCCCGAGGTGACCCTGTACCTACAGTACGATGGAGGAAAGATGATGGAGAGCTGCCCAAATCCAGATATGAAATCCGAGATGATCATACCTTGAAAATTAGGAAGGTGACAGCTGGTGACATGGGTTCATACACTTGTGTTGCAGAAAATATGGTGGGCAAAGCTGAAGCATCTGCTACTCTGACTGTTCAAG |  | |
| LV-CCNT2  ATGGCGTCGGGCCGTGGAGCTTCTTCTCGCTGGTTCTTTACTCGGGAACAGCTGGAGAACACGCCGAGCCGCCGCTGCGGAGTGGAGGCGGATAAAGAGCTCTCGTGCCGCCAGCAGGCGGCCAACCTCATCCAGGAGATGGGACAGCGTCTCAATGTCTCTCAGCTTACAATAAACACTGCGATTGTTTATATGCACAGGTTTTATATGCACCATTCTTTCACCAAATTCAACAAAAATATAATATCGTCTACTGCATTATTTTTGGCTGCAAAAGTGGAAGAACAGGCTCGAAAACTTGAACATGTTATCAAAGTAGCACATGCTTGTCTTCATCCTCTAGAGCCACTGCTGGATACTAAATGTGATGCTTACCTTCAACAGACTCAAGAACTGGTTATACTTGAAACCATAATGCTACAAACTCTAGGTTTTGAGATCACCATTGAACACCCACACACAGATGTGGTGAAATGTACCCAGTTAGTAAGAGCAAGCAAGGATTTGGCACAGACATCCTATTTCATGGCTACCAACAGTCTGCATCTTACAACCTTCTGTCTTCAGTACAAACCAACAGTGATAGCATGTGTATGCATTCATTTGGCTTGCAAATGGTCCAATTGGGAGATCCCTGTATCAACTGATGGAAAGCATTGGTGGGAATATGTGGATCCTACAGTTACTCTAGAATTATTAGATGAGCTAACACATGAGTTTCTACAAATATTGGAGAAAACGCCTAATAGGTTGAAGAAGATTCGAAACTGGAGGGCTAATCAGGCAGCTAGGAAACCAAAAGTAGATGGACAGGTATCAGAGACACCACTTCTTGGTTCATCTTTGGTCCAGAATTCCATTTTAGTAGATAGTGTCACTGGTGTGCCTACAAACCCAAGTTTTCAGAAACCATCTACATCAGCATTCCCTGCGCCAGTACCTCTAAATTCAGGAAATATTTCTGTTCAAGACAGCCATACATCTGATAATTTGTCAATGCTAGCAACAGGAATGCCAAGTACTTCATACGGTTTATCATCACACCAGGAATGGCCTCAACATCAAGACTCAGCAAGGACAGAACAGCTATATTCACAGAAACAGGAGACATCTTTGTCTGGTAGCCAGTACAACATCAACTTCCAGCAGGGACCTTCTATATCACTGCATTCAGGATTACATCACAGACCTGACAAAATTTCAATCATTCTTCTGTTAAGCAAGAATATACTCATAAAGCAGGGAGCAGTAAACACCATGGGCCAATTTCCACTACTCCAGGAATAATTCCTCAGAAAATGTCTTTAGATAAATATAGAGAAAAGCGTAAACTAGAAACTCTTGATCTCGATGTAAGGGATCATTATATAGCTGCCCAGGTAGAACAGCAGCACAAACAAGGGCAGTCACAGGCAGCCAGCAGCAGTTCTGTTACTTCTCCCATTAAAATGAAAATACCTATCGCAAATACTGAAAAATACATGGCAGACAAAAAGGAAAAGAGTGGGTCACTGAAATTACGGATTCCAATACCACCCACTGATAAAAGCGCCAGTAAAGAAGAACTGAAAATGAAAATAAAAGTTTCTTCTTCAGAAAGACACAGCTCTTCTGATGAAGGCAGTGGGAAGAGCAAACATTCAAGCCCACATATTAGCAGAGACCATAAGGAGAAGCACAAGGAGCATCCTTCAAGCCGCCACCACACCAGCAGCCACAAGCATTCCCACTCGCATAGTGGCAGCAGCAGCGGTGGCAGTAAACACAGTGCCGACGGAATACCACCCACTGTTCTGAGGAGTCCTGTTGGCCTGAGCAGTGATGGCATTTCCTCTAGCTCCAGCTCTTCAAGGAAGAGGCTGCATGTCAATGATGCATCTCACAACCACCACTCCAAAATGAGCAAAAGTTCCAAAAGTTCAGGTGGGCTACGGACATCTCAGCACCCTCGTGAAACTGGCAAGAAGCCAGTGGAGACCAACGGTCCTGA |  | |

Supplementary Table S3

Effective sequences (5’-3’) of lentivirus plasmids-knockdown.

| Plasmids | 5’-3’ |
| --- | --- |
| sh-NC | UUCUCCGAACGUGUCACGU |
| sh-circROBO1-1 | GAAAACACAAGAUAUGAAA |
| sh-circROBO1-2 | GTTCAAGATACGAGGAGGAAA |

Supplementary Table S4

Sequences of siRNAs used in this study

| Definition | 5’-3’ |
| --- | --- |
| si-NC | UUCUCCGAACGUGUCACGU |
| si-circROBO1-1 | GAAAACACAAGAUAUGAAA |
| si-circROBO1-2 | GTTCAAGATACGAGGAGGAAA |

Supplementary Table S5

miRNA mimics and inhibitor sequences (5’-3’).

| Name | | 5’-3’ |
| --- | --- | --- |
| miR-inhibitor-NC | Sense | UUCUCCGAACGUGUCACGUTT |
|  | Antisense | None |
| miR-130a-5p inhibitor | Sense | GGGCAGACAGUAGCACAAUGUGAA |
|  | Antisense | None |
| miR-mimic-NC | Sense | CAGUACUUUUGUGUAGUACAA |
|  | Antisense | TTGUACUACACAAAAGUACUG |
| miR-130a-5p mimic | Sense | UUCACAUUGUGCUACUGUCUGCCC |
|  | Antisense | GCAGACAGUAGCACAAUGUGAAUU |

Supplementary Table S6

The probe sequences (5’-3’) for RNA pull-down assay.

| Probes for RNA pull-down | 5’-3’ | |
| --- | --- | --- |
| control-biotin（anti-sense） | | Biotin-GCAGACAGUAGCACAAUGUGAA |
| miR-130a-5p-bition (sense） | | Biotin-UUCACAUUGUGCUACUGUCUGC |


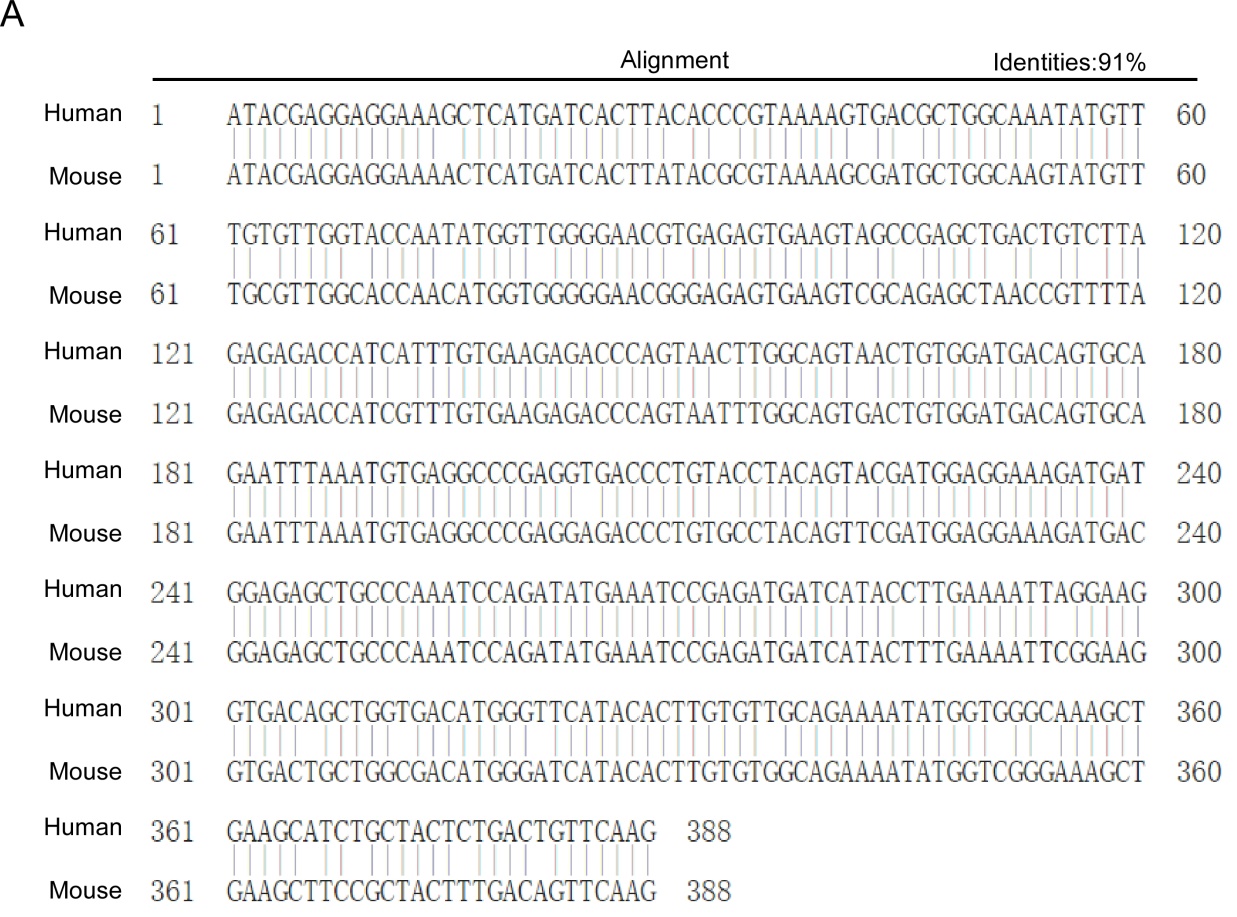


Supplementary Figure 1. Sequence alignment identification of human and mouse circROBO1. (A) Human-mouse circRNA sequence alignment through BLAST.


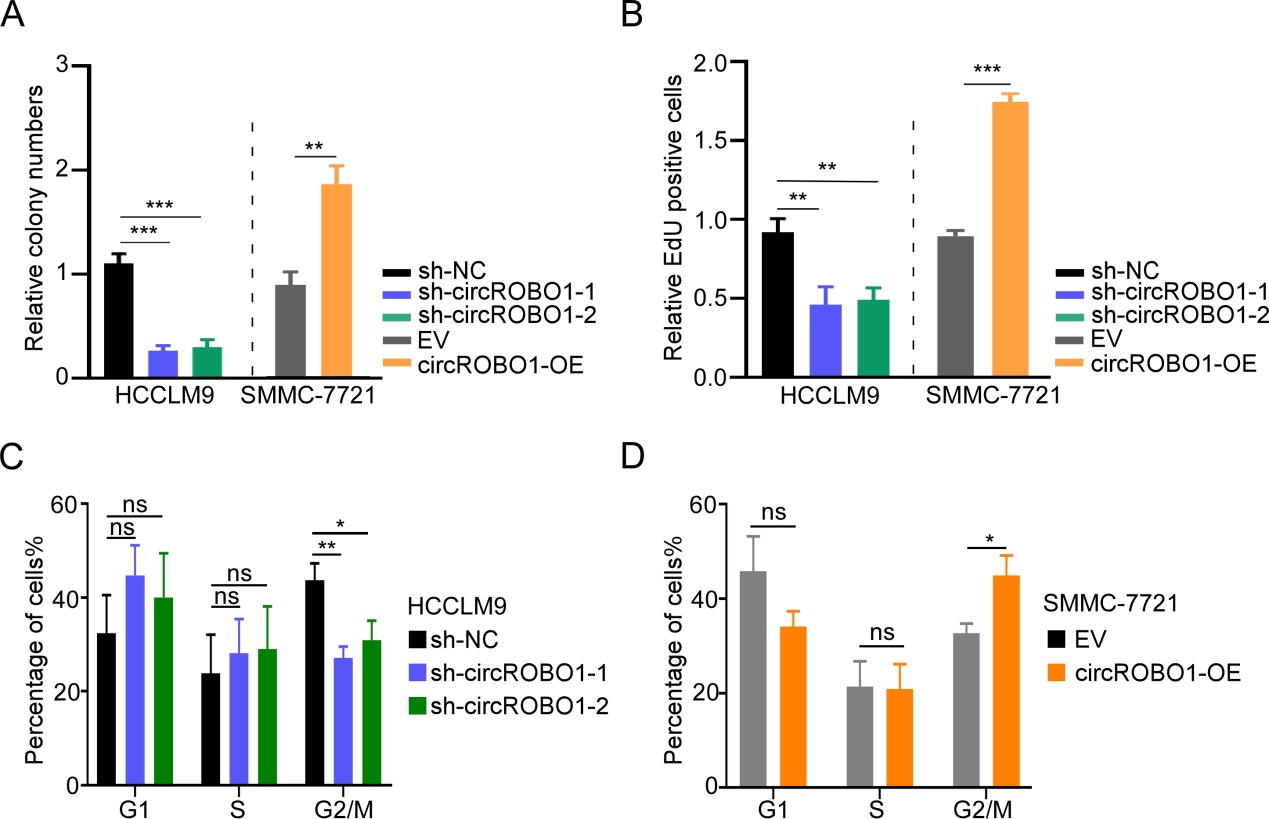


Supplementary Figure 2. circROBO1 overexpression enhanced HCC cell proliferation. (A and B) The quantification of plate colony formation (A) and EdU (B) assays in HCCLM9 and SMMC-7721 cells as indicated treatments. (C and D) The number of G2/M phase cells was decreased after circROBO1 knockdown in HCCLM9 cells (C), while overexpression of circROBO1 elevated the numbers of G2/M phase cells (D). Data are presented as Mean+SD. **p*<0.05; ***p*<0.01;****p*<0.001.


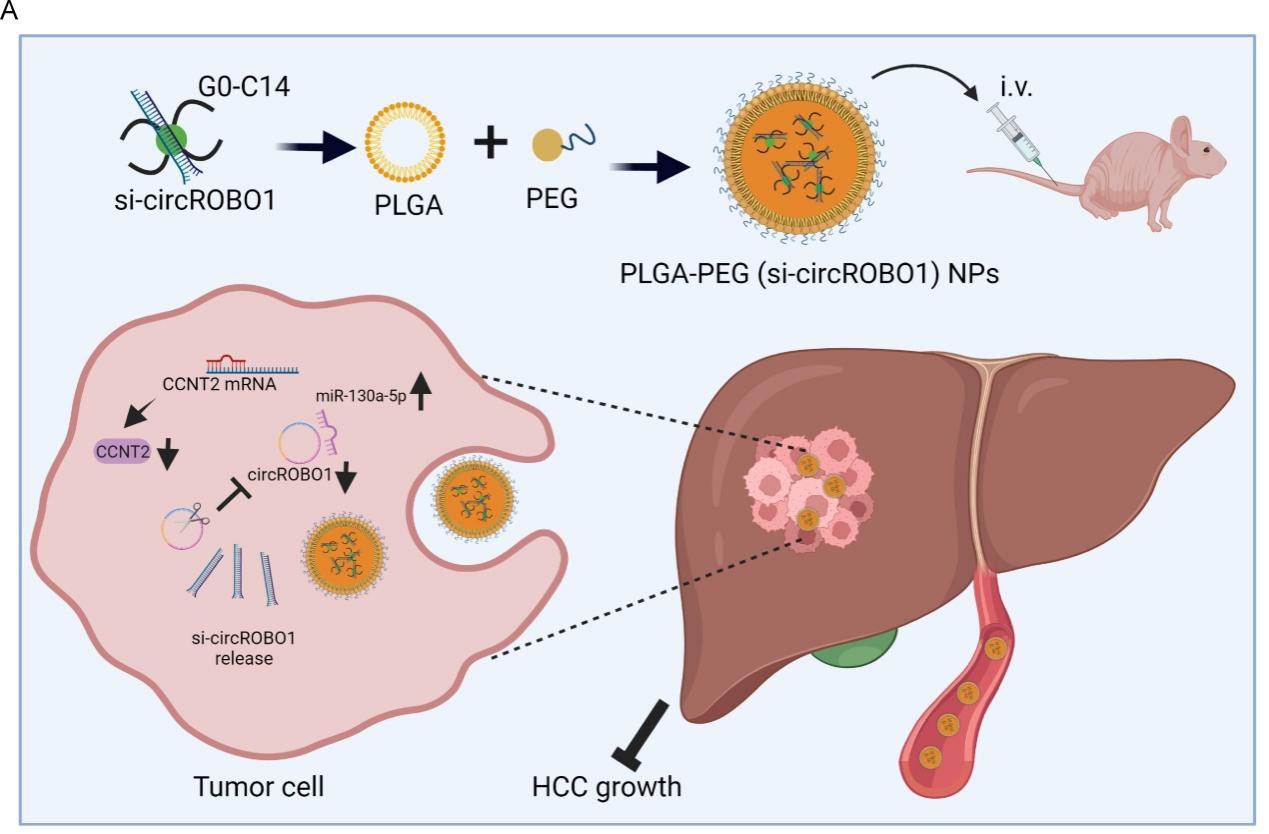


Supplementary Figure 3. Schematic illustration of the Nanoparticles-mediated circROBO1 silencing to inhibit hepatocellular carcinoma progression by modulating miR-130a-5p/CCNT2 axis.
